# Supplementary material for: “Red-to-blue” colorimetric detection of cysteine via anti-etching of silver nanoprisms
Source: Royal Society of Chemistry journal article supplement (doi:10.1039/c4nr03309d), 2014-01-01
Supplement: c4nr03309d1.pdf [file c4nr03309d1.pdf]

## Supporting Information

### **“Red-to-blue” colorimetric detection for cysteine via anti-etching of silver nanoprisms**

Yonglong Li<sup>a,b</sup>, Zihou Li<sup>a</sup>, Yuexia Gao<sup>a</sup>, An Gong<sup>a</sup>, Yuejie Zhang<sup>a</sup>, Narayan S. Hosmane<sup>c</sup>,  
Zheyu Shen<sup>a,\*</sup>, Aiguo Wu<sup>a,\*</sup>

<sup>a</sup>Key Laboratory of Magnetic Materials and Devices, & Division of Functional Materials and Nano Devices, Ningbo Institute of Materials Technology & Engineering, Chinese Academy of Sciences, Ningbo, Zhejiang, 315201, China.

<sup>b</sup>Nano Science and Technology Institute, University of Science and Technology of China, Suzhou, Jiangsu, 215123, China.

<sup>c</sup>Department of Chemistry & Biochemistry, Northern Illinois University, DeKalb, IL 60115, USA.

*\*Corresponding authors.*

Tel: +86 574 86685039, or +86 574 87617278; Fax: +86 574 86685163

*E-mail:* aiguo@nimte.ac.cn; or shenzheyu@nimte.ac.cn

1  
2 **Table S1. Comparison of various typical techniques for Cys analysis in solution**

| Method       | Technique in detail                                                                     | LOD (Naked eyes / UV-vis) | Selectivity | Linear range (nM) | Ref.      |
|--------------|-----------------------------------------------------------------------------------------|---------------------------|-------------|-------------------|-----------|
| UV-vis       | Cys inducing the self-assembly of gold nanorods                                         | --/--                     | Not good    | --                | 21        |
| UV-vis       | Cys inducing the end-to-end assembly of gold nanorods                                   | --/10pM                   | --          | 10-1000           | 22        |
| Colorimetry  | Cys coordinated with Hg <sup>2+</sup> inducing melting transition of DNA linked AuNPs   | 100nM/--                  | Good        | 50-1000           | 23        |
| Colorimetry  | Cys inducing CTAB capped AuNPs aggregation                                              | --/24nM                   | Good        | 82.5-330          | 24        |
| Colorimetry  | Cys inducing AgNPs aggregation in the presence of Cr <sup>3+</sup>                      | --/1nM                    | Good        | 1-10 <sup>6</sup> | 25        |
| Colorimetry  | Cys etching the concer of AgNPRs                                                        | 160nM/-                   | Good        | --                | 26        |
| Fluorescence | Cys quenching the emissive silver nanoclusrrs by thiol-adsorption-accelerated oxidation | -/20nM                    | Good        | 25-6000           | 27        |
| Fluorescence | Cys quenching the fluorescence of glutathione-pretected silver nanoclusrrs              | --/<3nM                   | Good        | 0-500             | 28        |
| Colorimetry  | Cys protecting AgNPRs from I <sup>-</sup> attacked                                      | 25nM/10nM                 | Good        | 50-1000           | This work |

3  
4

1

2 **Table S2. Determination of Cys in rabbit body fluid samples (n=3)**

| Sample      | Added <sup>a</sup> ( $\mu$ M) | Found <sup>b</sup> ( $\mu$ M) | Recovery(%) <sup>c</sup> |
|-------------|-------------------------------|-------------------------------|--------------------------|
| 1% FBS      | 0                             | 0.388                         | --                       |
|             | 0.1                           | 0.514                         | 126                      |
|             | 0.5                           | 0.959                         | 114.2                    |
| 1%Urine     | 0                             | 0.416                         | --                       |
|             | 0.1                           | 0.541                         | 125                      |
|             | 0.5                           | 1.058                         | 128.4                    |
| 0.1% Plasma | 0                             | 0.125                         | --                       |
|             | 0.1                           | 0.242                         | 117                      |
|             | 0.5                           | 0.573                         | 89.6                     |
| 0.5% Plasma | 0                             | 0.475                         | --                       |
|             | 0.1                           | 0.708                         | 227                      |
|             | 0.5                           | 1.154                         | 135.8                    |

3 <sup>a</sup> The added amount of Cys in the real samples;4 <sup>b</sup>The Cys concentration in the bio-samples determined by our detection system using UV-vis  
5 spectroscopy;6 <sup>c</sup>Calculated from the equation: (Found value with Cys addition – Found value without Cys  
7 addition)/Added value.

8

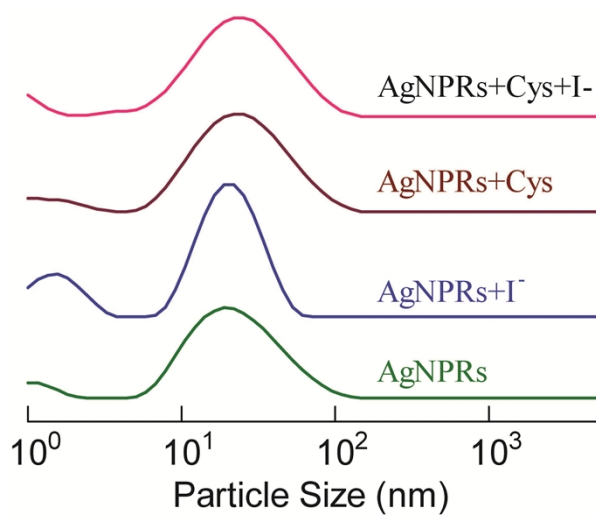

**Figure S1.** Size distribution of AgNPRs without I<sup>-</sup> and Cys (control), AgNPRs incubated with 5.0  $\mu$ M of I<sup>-</sup>, AgNPRs in the presence of Cys (5.0  $\mu$ M), AgNPRs incubated with 5.0  $\mu$ M of I<sup>-</sup> in the presence of Cys (5.0  $\mu$ M).

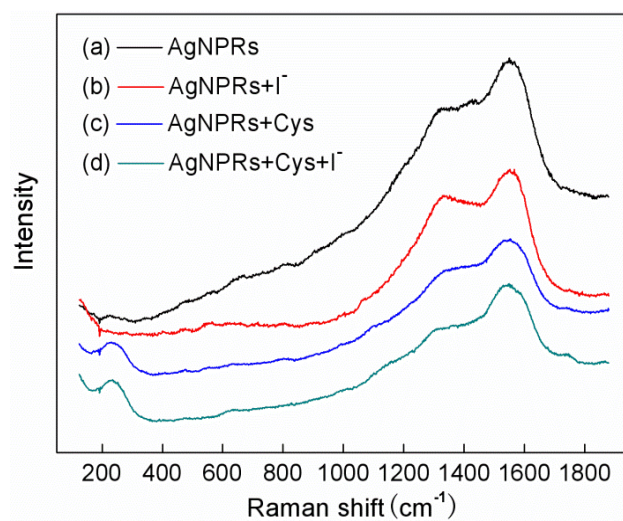

**Figure S2.** Raman spectra of AgNPRs at different conditions. (a): AgNPRs; (b): AgNPRs incubated with 5.0  $\mu\text{M}$  of  $\text{I}^-$ ; (c): AgNPRs in the presence of Cys (5.0  $\mu\text{M}$ ); (d): AgNPRs incubated with 5.0  $\mu\text{M}$  of  $\text{I}^-$  in the presence of Cys (5.0  $\mu\text{M}$ ).

1

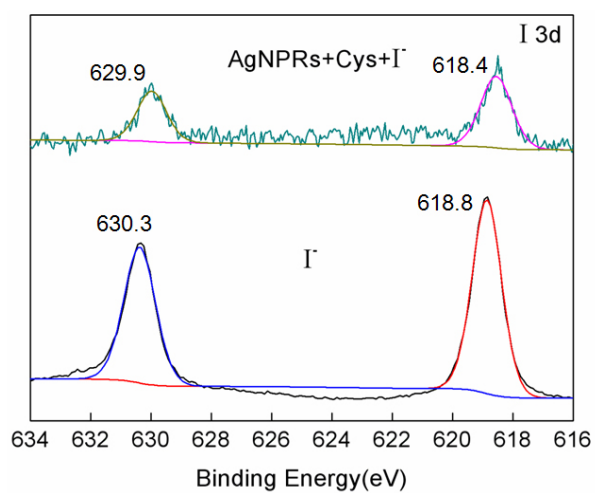

2

3

4 **Figure S3.** XPS spectra of I 3d of KI and AgNPRs incubated with I<sup>-</sup> in the presence of Cys.

5

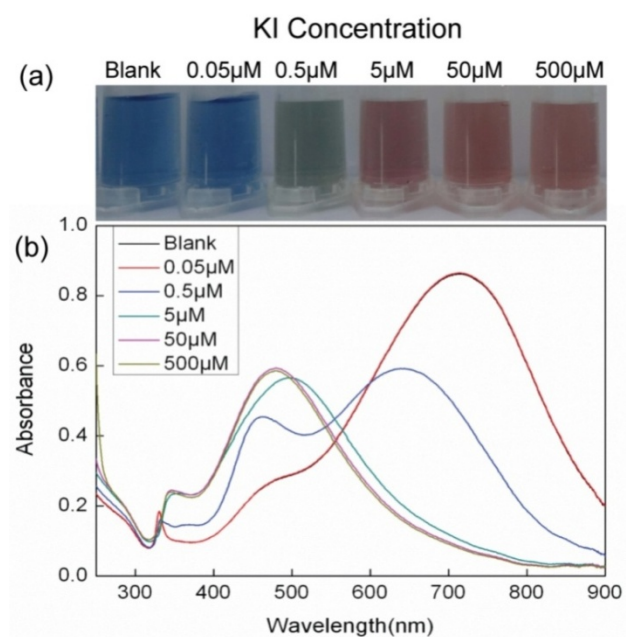

**Figure S4.** Photographic image (a) and corresponding UV-vis spectra (b) of AgNPR dispersions in the presence of various KI concentrations. The incubation time is 10 min.

1

2

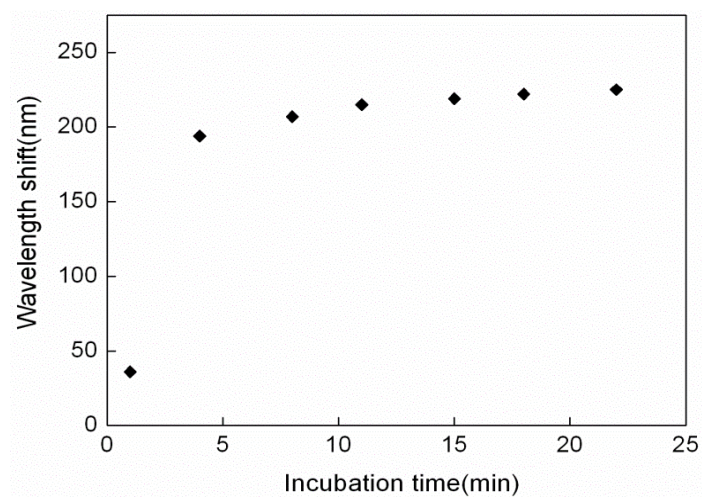

3

4

5 **Figure S5.** Plot of wavelength shift versus incubation time of AgNPRs and  $I^-$  ( $5.0 \mu M$ ) at room  
6 temperature. The wavelength shift is calculated between the peak wavelengths of the AgNPR  
7 dispersions incubated with  $I^-$  and that without  $I^-$  incubation.

1

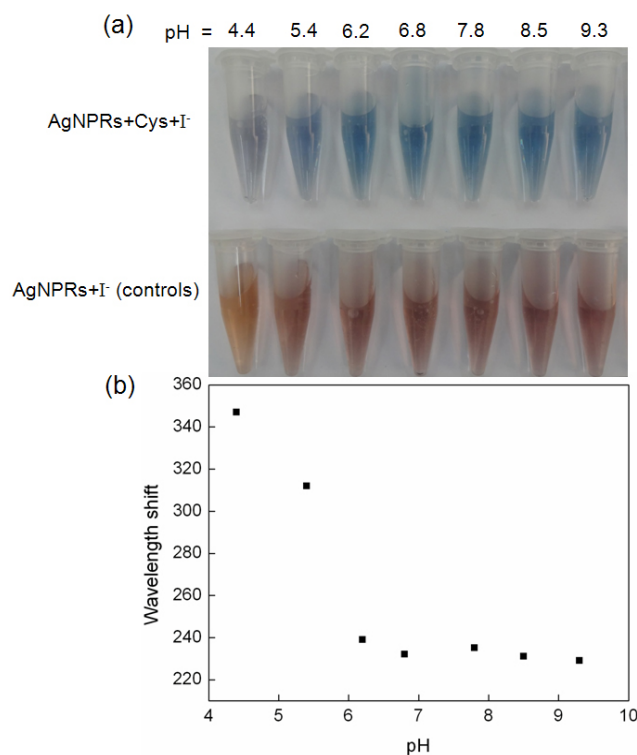

2

3

**Figure S6.** Influence of pH value of AgNPR dispersions (incubated with 5.0  $\mu\text{M}$  of  $\text{I}^-$  in the presence of 5.0  $\mu\text{M}$  of Cys) on the sensing effect of Cys: (a) Photographic image, (b) Plot of wavelength shift, which is calculated between the peak wavelengths of the AgNPR dispersions incubated with  $\text{I}^-$  (5.0  $\mu\text{M}$ ) in the presence of Cys and that in the absence of Cys, as a function of pH. The AgNPR dispersions incubated with 5.0  $\mu\text{M}$  of  $\text{I}^-$  in the absence of Cys are used as controls. The incubation time is 10 min.

10

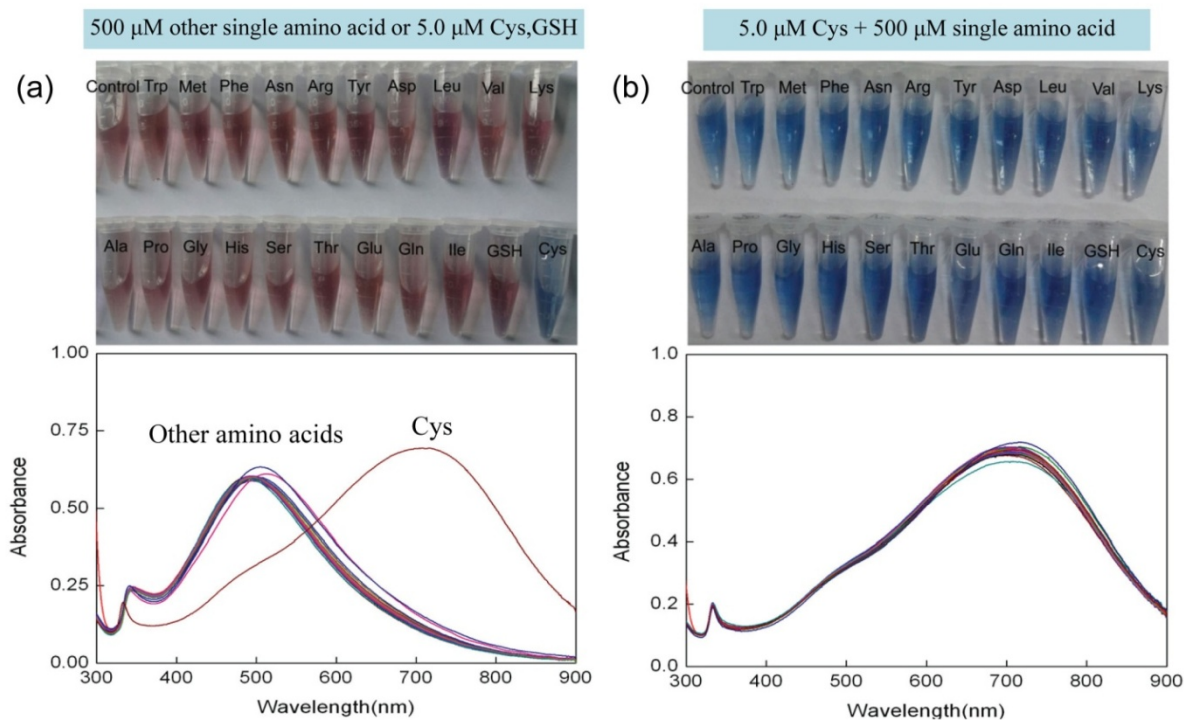

1  
2  
3 **Figure S7.** Selectivity of the AgNPRs-based detection system for Cys compared with other amino  
4 acids. (a): Photographic image of and corresponding UV-vis spectra of the AgNPR dispersions  
5 incubated with 5.0  $\mu\text{M}$  of  $\text{I}^-$  in the presence of single amino acid (the concentration is 5.0  $\mu\text{M}$  for  
6 Cys, GSH, but 500  $\mu\text{M}$  for other amino acids); the AgNPR dispersion incubated with 5.0  $\mu\text{M}$  of  $\text{I}^-$   
7 in the absence of amino acid is used as a control. (b): Photographic image of and corresponding  
8 UV-vis spectra of the AgNPR dispersions incubated with 5.0  $\mu\text{M}$  of  $\text{I}^-$  in the presence of 5.0  $\mu\text{M}$  of  
9 Cys and 500  $\mu\text{M}$  of single amino acid; the AgNPR dispersion incubated with 5.0  $\mu\text{M}$  of  $\text{I}^-$  in the  
10 presence of 5.0  $\mu\text{M}$  of Cys is used as a control.

11

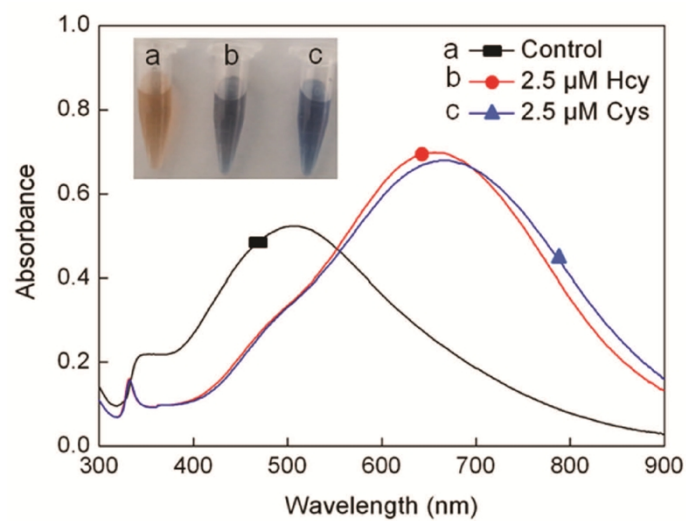

**Figure S8.** The UV-vis spectra of AgNPRs at the different conditions. (a) AgNPRs incubated with 5.0  $\mu\text{M}$  of  $\text{I}^-$  (control); (b) AgNPRs incubated with 5.0  $\mu\text{M}$  of  $\text{I}^-$  in the presence of stabilizer homocysteine (Hcy) (2.5  $\mu\text{M}$ ); (c) AgNPRs incubated with 5.0  $\mu\text{M}$  of  $\text{I}^-$  in the presence of stabilizer Cys (2.5  $\mu\text{M}$ ). The inset image corresponds to the colorimetric response.

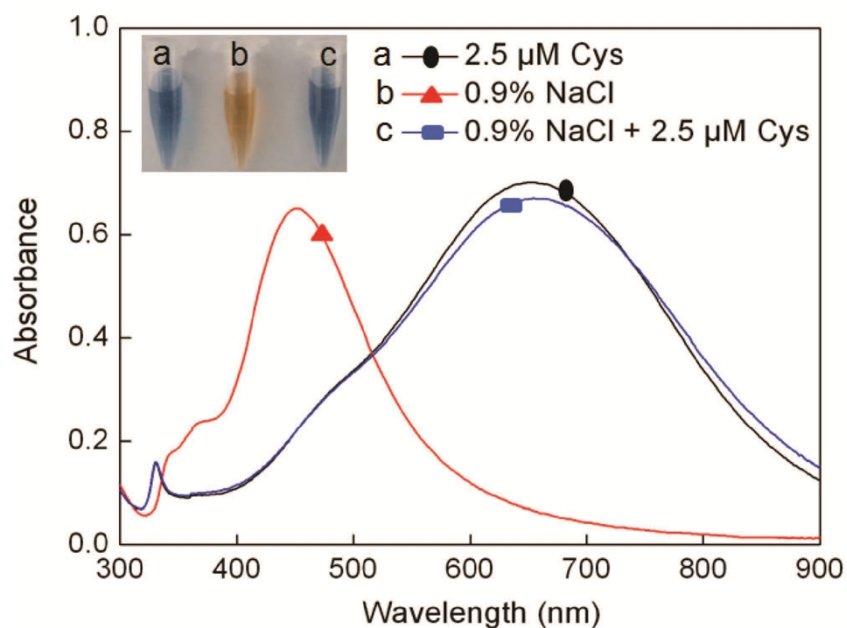

**Figure S9.** The UV-vis spectra of AgNPRs at the different conditions. (a) AgNPRs incubated with 5.0  $\mu\text{M}$  of  $\text{I}^-$  in the presence of 2.5  $\mu\text{M}$  Cys (control); (b) AgNPRs incubated with 5.0  $\mu\text{M}$  of  $\text{I}^-$  in the presence of NaCl (0.9 %); (c) AgNPRs incubated with 5.0  $\mu\text{M}$  of  $\text{I}^-$  in the presence of NaCl (0.9 %) and Cys (2.5  $\mu\text{M}$ ). The inset image corresponds to the colorimetric response.

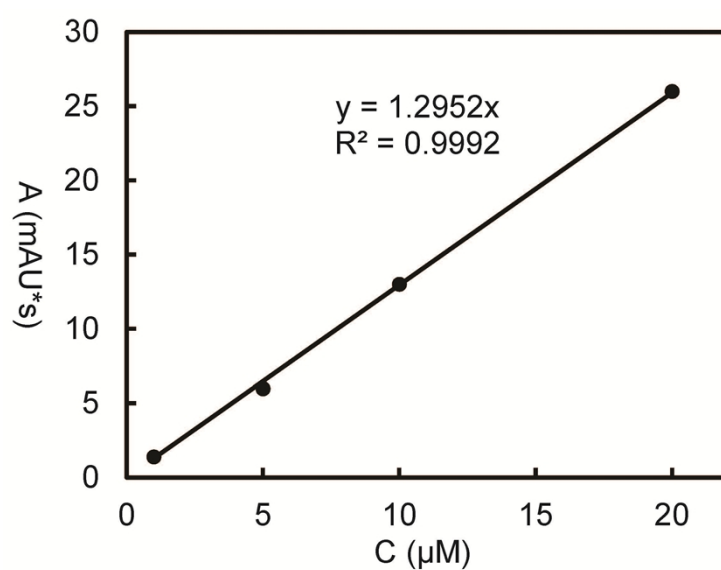

**Figure S10.** A calibration curve constructed with standard Cys solutions. The standard Cys solutions were determined by HPLC with a C18 column. The flow rate is 1.0 mL/min. The mobile phase is a mixture of water and acetonitrile (95:5).
